# Supplementary material
Source: PubMed Central journal article supplement (PMC4167377)
Supplement: NIHMS616773-supplement-1.pdf [file NIHMS616773-supplement-1.pdf]

## Supplemental Figure 1

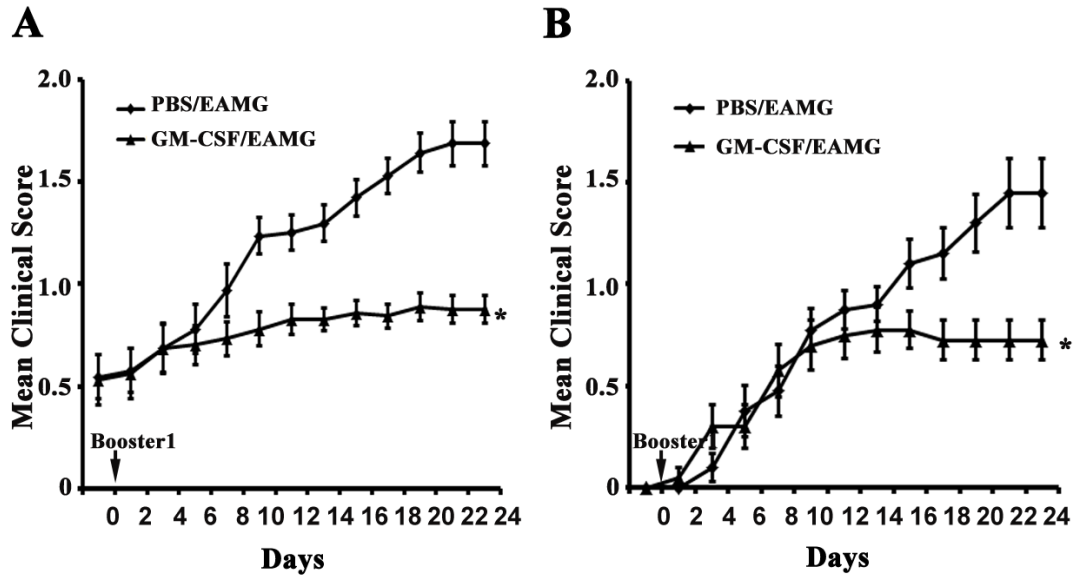

**Figure S1. Amelioration of the clinical severity of donor mice upon GM-CSF treatment.** Donor EAMG mice were treated with GM-CSF or PBS for 10 days. Day 0 corresponds to the initiation of treatment at the time of first booster immunization. A. Donor mice for suppression studies shown in Fig. 5A. \* $p < 0.0005$  starting at day 10 ( $n = 32$ ). B. Donor mice for suppression studies shown in Fig. 5C. \* $p < 0.04$  starting at day 16 ( $n = 20$ ) (also see Table S1).

Table1. Summary of treatment protocols and number of animals

| Figure | Protocols                                                                       | No. of animals/group in each experiment | No. of experiments | Pooled No. of animals in each group |
|--------|---------------------------------------------------------------------------------|-----------------------------------------|--------------------|-------------------------------------|
| 1A     | Donor mice: booster at Day 0, GM-CSF treatment started at Day 0 for 10 d.       | 10                                      | 2                  | 20                                  |
| 4A     | Booster at Day 0 and Day 24, AT at Day -1.                                      | 5                                       | 2                  | 10                                  |
| 5A     | Day 0: first AT (at 21d post booster1), second AT at Day 14, booster2 at Day 7. | 8                                       | 2                  | 16                                  |
| 5C     | Booster at Day 0 and Day 30, AT at Day 10 and Day 40.                           | 5                                       | 2                  | 10                                  |
| S1A    | Donor mice: same as 1A                                                          | 16                                      | 2                  | 32                                  |
| S1B    | Donor mice: same as 1A                                                          | 10                                      | 2                  | 20                                  |

Mice were immunized with tAChR and given booster immunization every 24-30d. At least two booster immunizations were given except in donor mice (Fig. 1A, S1A and S1B) which received only one booster.

Table2. Absolute number of B cells and subsets ( $1 \times 10^5$ )

| Figure | Groups<br>Cells                      | Naïve    | PBS/EAMG             | GM-CSF/EAMG                                                        |
|--------|--------------------------------------|----------|----------------------|--------------------------------------------------------------------|
| 1B     | Total B cells                        | 121±9.2  | 125±10               | 133±7.1                                                            |
|        | CD1d <sup>hi</sup> CD5 <sup>+</sup>  | 1.92±0.5 | 3.57±0.2*<br>p <0.04 | 6.1±0.3**<br>p < 0.0001 vs Naïve group;<br>p < 0.00006 vs PBS/EAMG |
|        | CD19 <sup>+</sup> IL-10 <sup>+</sup> | 2.0±0.2  | 3.6±0.3*<br>p <0.006 | 6.4±0.6**<br>p < 0.01 vs Naïve;<br>p < 0.0001 vs. PBS/EAMG         |
| 1C     | CD19 <sup>+</sup> CD40 <sup>+</sup>  |          | 1.6±0.2              | 3.9±0.6*<br>p <0.006 vs PBS/EAMG                                   |
|        | CD19 <sup>+</sup> MHCII <sup>+</sup> |          | 3.1±0.3              | 4.0±0.5                                                            |
|        | CD19 <sup>+</sup> CD23 <sup>+</sup>  |          | 8.2±0.9              | 8.9±1.2                                                            |
|        | CD19 <sup>+</sup> IgM <sup>+</sup>   |          | 7.3±0.6              | 7.1±0.4                                                            |
|        | CD19 <sup>+</sup> IgD <sup>+</sup>   |          | 9.0±0.7              | 8.8±0.6                                                            |

Absolute cell number was determined by using total cellularity, determined by trypan blue dye exclusion and percentage of CD19<sup>+</sup> or B cell subsets. Total splenocytes ranged from  $6.4 \times 10^7$  to  $8.6 \times 10^7$ . P values listed were based on comparison with Naïve group unless otherwise specified (n = 6 each).

Table3. Absolute number of Tregs and proliferating CD4<sup>+</sup> T cells (1x10<sup>5</sup>)

| Figure            | Groups<br>Cells                      | CTRL<br>(no AT) | CD1d <sup>hi</sup> CD5 <sup>+</sup><br>(PBS/EAMG) | CD1d <sup>hi</sup> CD5 <sup>+</sup><br>(GM-CSF/EAMG)          |
|-------------------|--------------------------------------|-----------------|---------------------------------------------------|---------------------------------------------------------------|
| 4E<br>upper panel | Proliferating CD4 <sup>+</sup>       | 1.72±0.05       | 1.38±0.06*<br>p <0.001                            | 0.79±0.09**<br>p < 0.0001 vs. CTRL;<br>p < 0.001 vs. PBS/EAMG |
| 4E<br>lower panel | Total CD4 <sup>+</sup>               | 116±3.1         | 113±2.5                                           | 117±1.7                                                       |
|                   | CD25 <sup>+</sup> Foxp3 <sup>+</sup> | 8.5±0.6         | 11.2±0.8*<br>p <0.03                              | 14.7±0.3**<br>p < 0.00001 vs CTRL;<br>p < 0.002 vs. PBS/EAMG  |
| 5E<br>upper panel | Proliferating CD4 <sup>+</sup>       | 1.25±0.15       | 0.71±0.06*<br>p <0.002                            | 0.53±0.05**<br>p <0.00005 vs CTRL;<br>p<0.0006 vs. PBS/EAMG   |
| 5E<br>lower panel | Total CD4 <sup>+</sup>               | 116±2.2         | 114±3.1                                           | 115±2.4                                                       |
|                   | CD25 <sup>+</sup> Foxp3 <sup>+</sup> | 10.7±0.2        | 12.9±0.3*<br>p <0.0003                            | 17.5±1.1**<br>p <0.0002 vs CTRL;<br>p<0.005 vs. PBS/EAMG      |

Absolute cell number was determined by using total cellularity, determined by trypan blue dye exclusion and percentage of CD4<sup>+</sup> or CD4<sup>+</sup>CD25<sup>+</sup> Foxp3<sup>+</sup> cells. For all T cell proliferation, 5x10<sup>5</sup>/ well of CFSE labeled CD4<sup>+</sup> cells were used. Total splenocytes ranged from 8.4 x10<sup>7</sup> to 10x10<sup>7</sup>. P values listed were based on comparison with CTRL unless otherwise specified (n = 6 each).
